# Supplementary material for: High-performance and environmentally friendly circularly polarized light direct detection based on ZnO nanowires and chiral cellulose nanocrystals
Source: Royal Society of Chemistry journal article supplement (doi:10.1039/d3tc04062c), 2024-01-01
Supplement: d3tc04062c1.pdf [file d3tc04062c1.pdf]

Supporting Information for Journal of Materials Chemistry C

## High-performance and environmentally friendly circularly polarized light direct detection based on ZnO nanowires and chiral cellulose nanocrystals

Junjun Yang, Yuxin Huang, Sixian He, Congcong Dang, Ming Li, Liancheng Zhao and Liming Gao\*

State Key Laboratory of Metal Matrix Composites, School of Material Science and Engineering, Shanghai Jiao Tong University, Shanghai, 200240, P. R. China.

E-mail: [liming.gao@sjtu.edu.cn](mailto:liming.gao@sjtu.edu.cn)

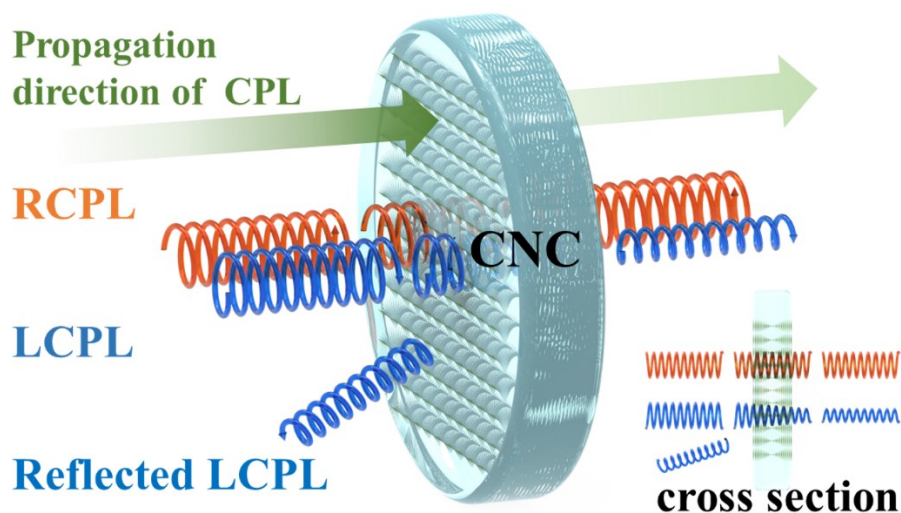

Figure S1 Schematic diagram of selective transmission of CNC film to CPL

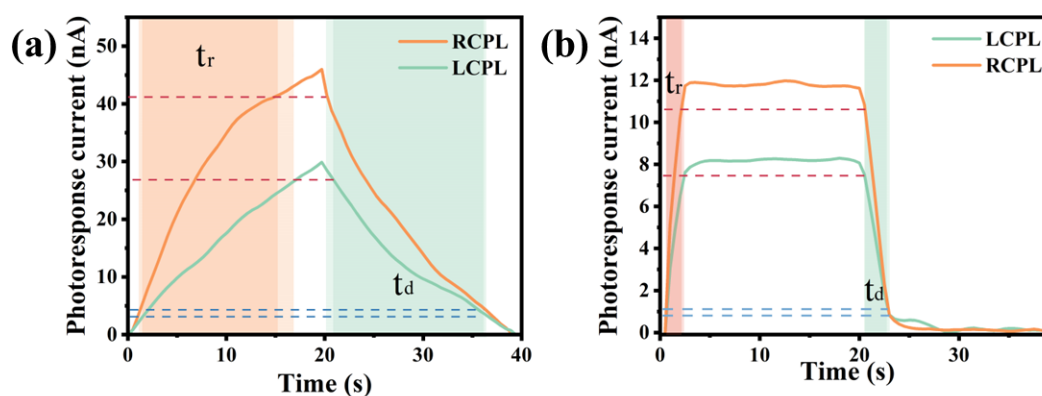

Figure S2 (a) Photoelectric response and recovery time of D1 detector (b) Photoelectric response and recovery time of D2 detector

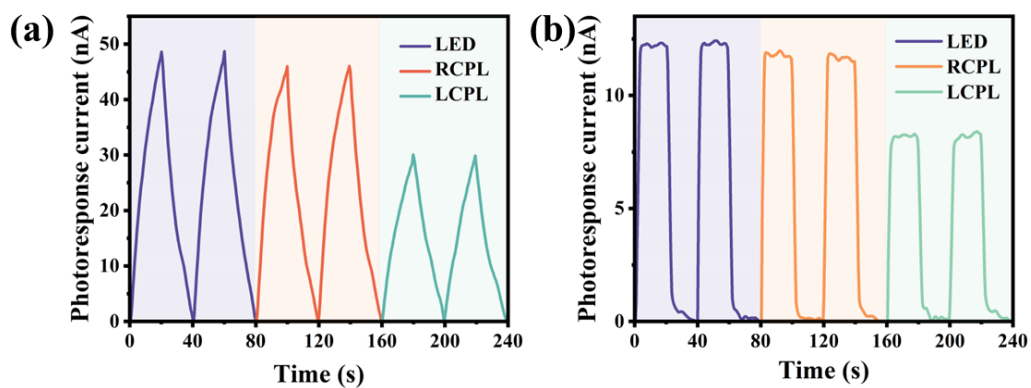

**Figure S3 The photocurrent response of the detector under different light sources  
(a) D1 detector (b) D2 detector**

**Table S1 Summary of performance indicators of other CPL detectors**

| Materials                                                                                                   | wavelength(nm) | P               | R (A/W)              | D* (Jones)                      | EQE (%)           | g <sub>ph</sub> | ref       |
|-------------------------------------------------------------------------------------------------------------|----------------|-----------------|----------------------|---------------------------------|-------------------|-----------------|-----------|
| ZnONWAs-<br>PEDOT:PSS-CNC                                                                                   | 365            | 3.65            | 0.58                 | $1.29 \times 10^1$ <sub>2</sub> | 69.42             | 0.36            | This work |
| tetraindole-fused PDI<br>3a                                                                                 | 730            | 2.5             | 0.45                 | $2.1 \times 10^{10}$            | 89                | 0.01            | 1         |
| 0D chiral copper<br>chloride hybrids                                                                        | 405            | /               | 452                  | /                               | $1.4 \times 10^5$ | 0.21            | 2         |
| CICPDI-Ph<br>enantiomers                                                                                    | 495            | $1 \times 10^7$ | 1200                 | $2.9 \times 10^{13}$            | $3 \times 10^5$   | 0.13            | 3         |
| P3CT/BN                                                                                                     | 375            | /               | $5.4 \times 10^{-4}$ | /                               | 0.18              | 0.1             | 4         |
| (R,R/(S,S)-ProSQ-<br>C6:PCBM                                                                                | 543            | /               | 0.21                 | /                               | 47                | 0.09            | 5         |
| chiral organic-<br>inorganic hybrid ( $\alpha$ -<br>PEA)PbI3 perovskites                                    | 395            | /               | 0.09                 | $7.1 \times 10^{11}$            | /                 | 0.08            | 6         |
| Quasi-2D chiral<br>perovskites<br>[(R)- $\beta$ -<br>MPA]2MAPb2I7                                           | 532            | /               | 3.8                  | $1.1 \times 10^{12}$            | 882               | 0.11            | 7         |
| (S- $\alpha$ -PEA)2PbI4 (left)<br>and (R- $\alpha$ -PEA)2PbI4<br>(right) chiral 2D-<br>perovskite nanowires | 505            | /               | 47.1                 | $1.24 \times 10^{13}$           | /                 | 0.15            | 8         |
| quasi-2D chiral<br>perovskites (R-, S-<br>NEA)2(MA) <sub>n-1</sub> PbI3<br>n+1 films                        | 405            | /               | 15.7                 | /                               | $4.8 \times 10^3$ | 0.15            | 9         |
| CNC and TiO2<br>nanotube arrays                                                                             | 365            | /               | /                    | /                               | /                 | 0.33            | 10        |
| PM6:(S,S)-BTP-4Cl                                                                                           | 830            | /               | 0.4                  | $>10^{11}$                      | 60                | 0.03            | 11        |
| R-VPEA and S-VPEA<br>perovskites                                                                            | 490            | /               | 1.6                  | $2.17 \times 10^1$ <sub>3</sub> | /                 | 0.22            | 12        |

Note: The data selection in this table adopts the comprehensive optimal principle. Most of the data are derived from the measurement conditions when the asymmetry factor is the largest, and the missing parameters are marked with /.

**Table S2 Summary of performance indicators of ZnO photodetector**

| <b>Material</b>                      | <b>Wavelength(nm)</b> | <b>Response time(s)</b> | <b>Recovery time(s)</b> | <b>Reference</b> |
|--------------------------------------|-----------------------|-------------------------|-------------------------|------------------|
| <b>ZnONWAs</b>                       | 365                   | 13.83                   | 15.91                   | <b>This work</b> |
| <b>ZnONWAs-<br/>PEDOT:PSS</b>        | 365                   | 1.53                    | 2.28                    | <b>This work</b> |
| <b>ZnO thin-film</b>                 | 325                   | 35                      | 90                      | 13               |
| <b>ZnONWAs</b>                       | 365                   | 28.5                    | 60.3                    | 14               |
| <b>ZnONWAs</b>                       | 390                   | 23                      | 33                      | 15               |
| <b>ZnO porous-<br/>nanostructure</b> | 365                   | 18                      | 25.4                    | 16               |
| <b>ZnO nanorods</b>                  | 365                   | 17.3                    | 6.4                     | 17               |

1. L. Zhang, I. Song, J. Ahn, M. Han, M. Linares, M. Surin, H. J. Zhang, J. H. Oh and J. B. Lin, *NATURE COMMUNICATIONS*, 2021, **12**.
2. J. Hao, H. P. Lu, L. L. Mao, X. H. Chen, M. C. Beard and J. L. Blackburn, *ACS NANO*, 2021, **15**, 7608-7617.
3. X. Shang, I. Song, J. H. Lee, W. Choi, J. Ahn, H. Ohtsu, J. C. Kim, J. Y. Koo, S. K. Kwak and J. H. Oh, *ACS NANO*, 2020, **14**, 14146-14156.
4. N. Y. Kim, J. Kyhm, H. Han, S. J. Kim, J. Ahn, D. K. Hwang, H. W. Jang, B. K. Ju and J. A. Lim, *ADVANCED FUNCTIONAL MATERIALS*, 2019, **29**.
5. M. Schulz, F. Balzer, D. Scheunemann, O. Arteaga, A. Lutzen, S. C. J. Meskers and M. Schiek, *ADVANCED FUNCTIONAL MATERIALS*, 2019, **29**.
6. C. Chen, L. Gao, W. R. Gao, C. Y. Ge, X. Du, Z. Li, Y. Yang, G. D. Niu and J. Tang, *NATURE COMMUNICATIONS*, 2019, **10**.
7. L. Wang, Y. X. Xue, M. H. Cui, Y. M. Huang, H. Y. Xu, C. C. Qin, J. Yang, H. T. Dai and M. J. Yuan, *ANGEWANDTE CHEMIE-INTERNATIONAL EDITION*, 2020, **59**, 6442-6450.
8. Y. J. Zhao, Y. C. Qiu, J. G. Feng, J. H. Zhao, G. S. Chen, H. F. Gao, Y. Y. Zhao, L. Jiang and Y. C. Wu, *JOURNAL OF THE AMERICAN CHEMICAL SOCIETY*, 2021, **143**, 8437-8445.
9. T. J. Liu, W. D. Shi, W. D. Tang, Z. L. Liu, B. C. Schroeder, O. Fenwick and M. J. Fuchter, *ACS NANO*, 2022, **16**, 2682-2689.
10. Y. Y. Yu, S. X. Zhao, B. Y. Zhang, S. L. Han, M. Li, L. C. Zhao and L. M. Gao, *ACS APPLIED NANO MATERIALS*, 2022, **5**, 899-907.
11. L. X. Liu, Y. Yang, L. Y. Zhu, J. Q. Zhang, K. Chen and Z. X. Wei, *SMALL*, 2022, **18**.

12. Y. J. Zhao, X. Yin, Z. K. Gu, M. Yuan, J. P. Ma, T. L. Li, L. Jiang, Y. C. Wu and Y. L. Song, *ADVANCED FUNCTIONAL MATERIALS*, 2023, DOI: 10.1002/adfm.202306199.
13. A. Sarkar, N. Gogurla, B. N. S. Bhaktha and S. K. Ray, *MATERIALS RESEARCH EXPRESS*, 2016, **3**.
14. H. Makhlouf, C. Karam, A. Lamouchi, S. Tingry, P. Miele, R. Habchi, R. Chtourou and M. Bechelany, *Applied Surface Science*, 2018, **444**, 253-259.
15. C. Soci, A. Zhang, B. Xiang, S. A. Dayeh, D. P. R. Aplin, J. Park, X. Y. Bao, Y. H. Lo and D. Wang, *Nano Letters*, 2007, **7**, 137-143.
16. A. Soni and K. R. Mavani, *Scripta Materialia*, 2019, **162**, 24-27.
17. Y. Wan, S. Gao, L. Li, J. Zhang, H. Fan, S. Jiao, J. Wang, Q. Yu and D. Wang, *JOURNAL OF MATERIALS SCIENCE-MATERIALS IN ELECTRONICS*, 2017, **28**, 11172-11177.
